# Supplementary material for: BCL-W is a regulator of microtubule inhibitor-induced mitotic cell death
Source: PubMed Central journal article supplement (PMC5122423; doi:10.18632/oncotarget.9586), 2016-05-25
Supplement: oncotarget-07-38718-s001.pdf [file oncotarget-07-38718-s001.pdf]

## BCL-W is a regulator of microtubule inhibitor-induced mitotic cell death

### SUPPLEMENTARY FIGURES AND VIDEOS

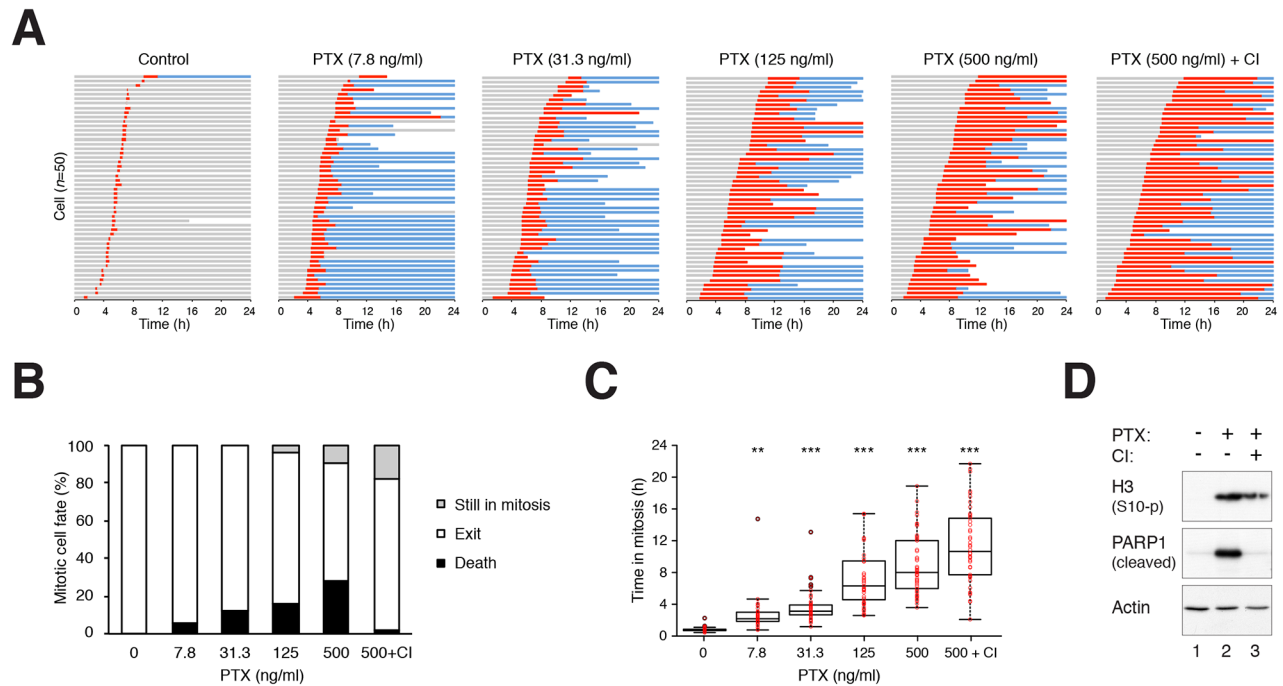

**Supplementary Figure S1: PTX-induced mitotic cell death can be abolished with a pan-caspase inhibitor in HCT116 cells.** **A.** PTX-mediated mitotic cell death can be abolished with a pan-caspase inhibitor. Live traces of HCT116 cells (expressing histone H2B-GFP) exposed to either DMSO or a 4-fold increasing concentration of PTX for 24 h ( $n=50$ ). Cells treated with 500 ng/ml of PTX was treated with either DMSO or Z-VAD-FMK (CI). Key: same as Figure 1C. **B.** Percentage of different mitotic fates from (A). **C.** Box-and-whisker plots showing elapsed time between mitotic entry and mitotic cell death/exit ( $n=50$  for each treatment). One-way ANOVA  $**P<0.01$ ;  $***P<0.001$  (all compare to DMSO control). **D.** Inhibition of caspases abolished PTX-mediated apoptosis. HCT116 cells were exposed to PTX (500 ng/ml) in the presence or absence of Z-VAD-FMK (CI) for 24 h. Lysates were prepared and analyzed with immunoblotting.

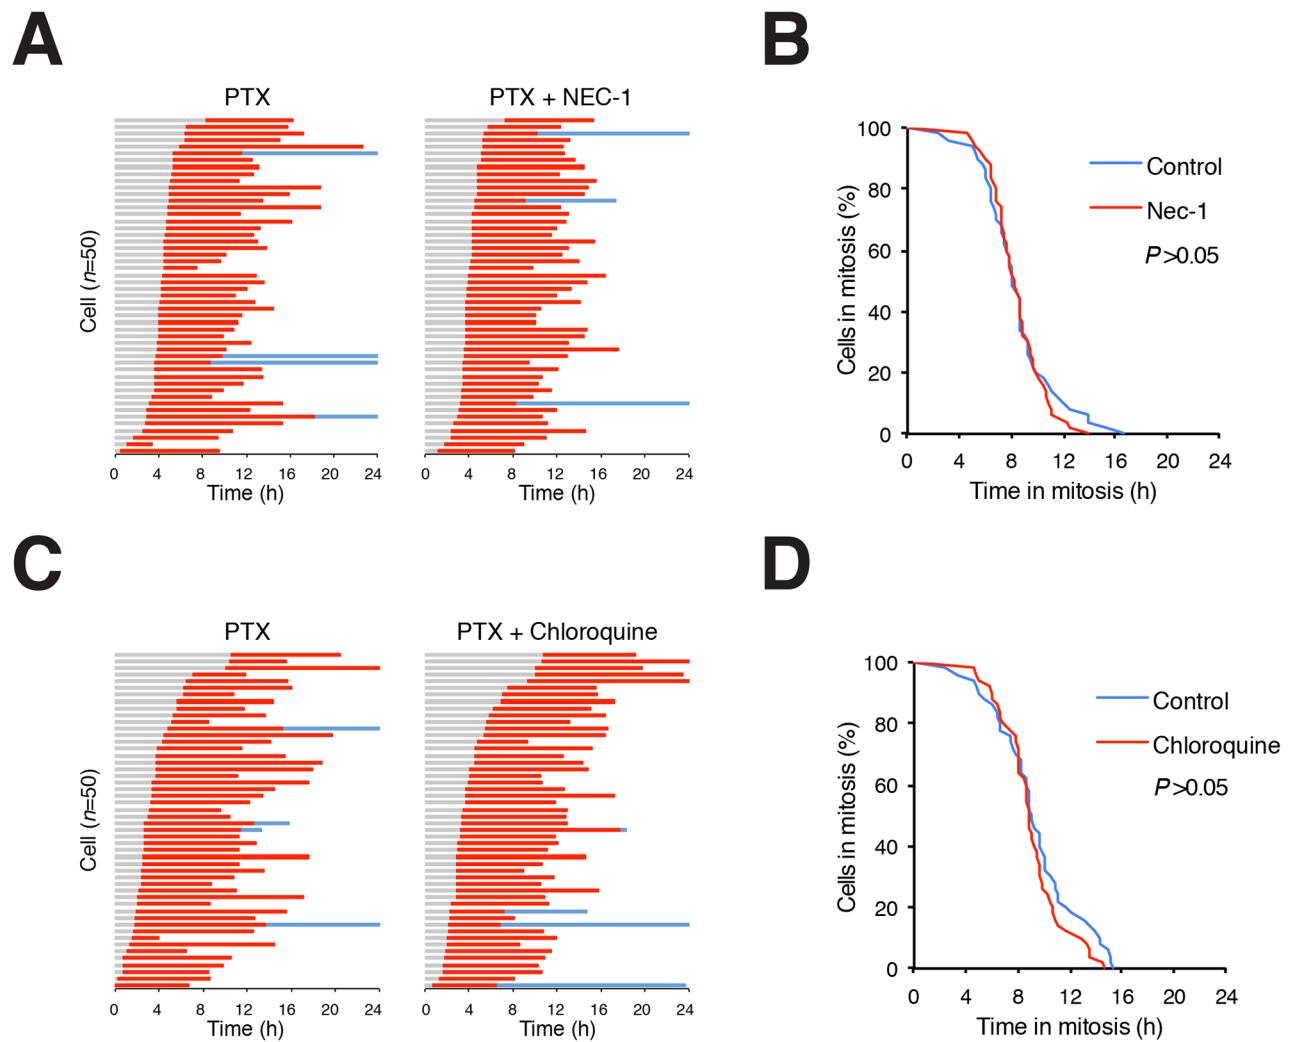

**Supplementary Figure S2: Inhibition of necroptosis or autophagy does not affect mitotic cell death.** **A.** Inhibition of necroptosis does not delay PTX-mediated mitotic cell death. Live trace of HeLa cells exposed to PTX (31.3 ng/ml) in the presence or absence of necrostatin-1 (NEC-1) ( $n=50$ ). Key: same as Figure 1C. **B.** The durations of mitotic block of cells from (A) are plotted using Kaplan-Meier estimator. **C.** Inhibition of autophagy does not delay PTX-mediated mitotic cell death. Live trace of HeLa cells exposed to PTX (31.3 ng/ml) in the presence or absence of chloroquine ( $n=50$ ). Key: same as Figure 1C. **D.** The durations of mitotic block of cells from (C) are plotted using Kaplan-Meier estimator.

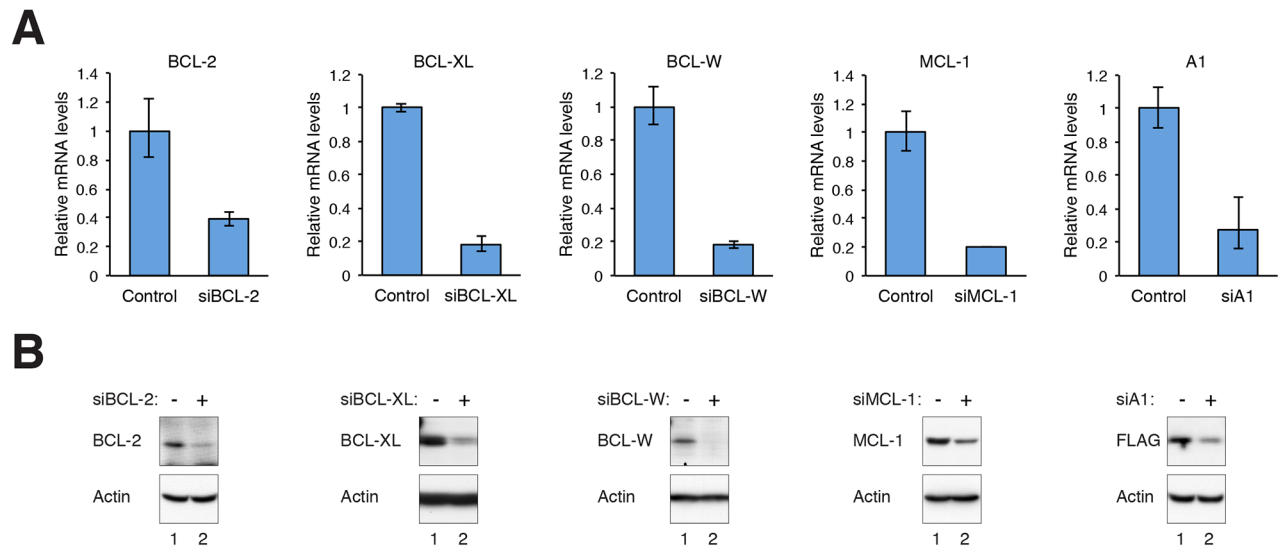

**Supplementary Figure S3: Depletion of anti-apoptotic BCL-2 family with siRNAs.** **A.** Downregulation of anti-apoptotic BCL-2 family by siRNA. HCT116 cells were transfected with siRNA targeting individual BCL-2 family member. The cells were harvested after 24 h. Total mRNA was extracted and the relative mRNA levels of the targeted BCL-2 family were determined by quantitative real-time PCR and normalized with actin. Mean $\pm$ 95% CI of triplicates. **B.** Protein levels of anti-apoptotic BCL-2 family after siRNA transfection. HCT116 cells were transfected with siRNA targeting individual BCL-2 family member. The cells were harvested after 24 h. Cell-free extracts were prepared and the corresponding BCL-2-like proteins were detected with immunoblotting. Uniform loading of lysates was confirmed by immunoblotting for actin. As no effective antibodies against A1 was available, FLAG-A1 was expressed by transient transfection and detected using anti-FLAG antibodies.

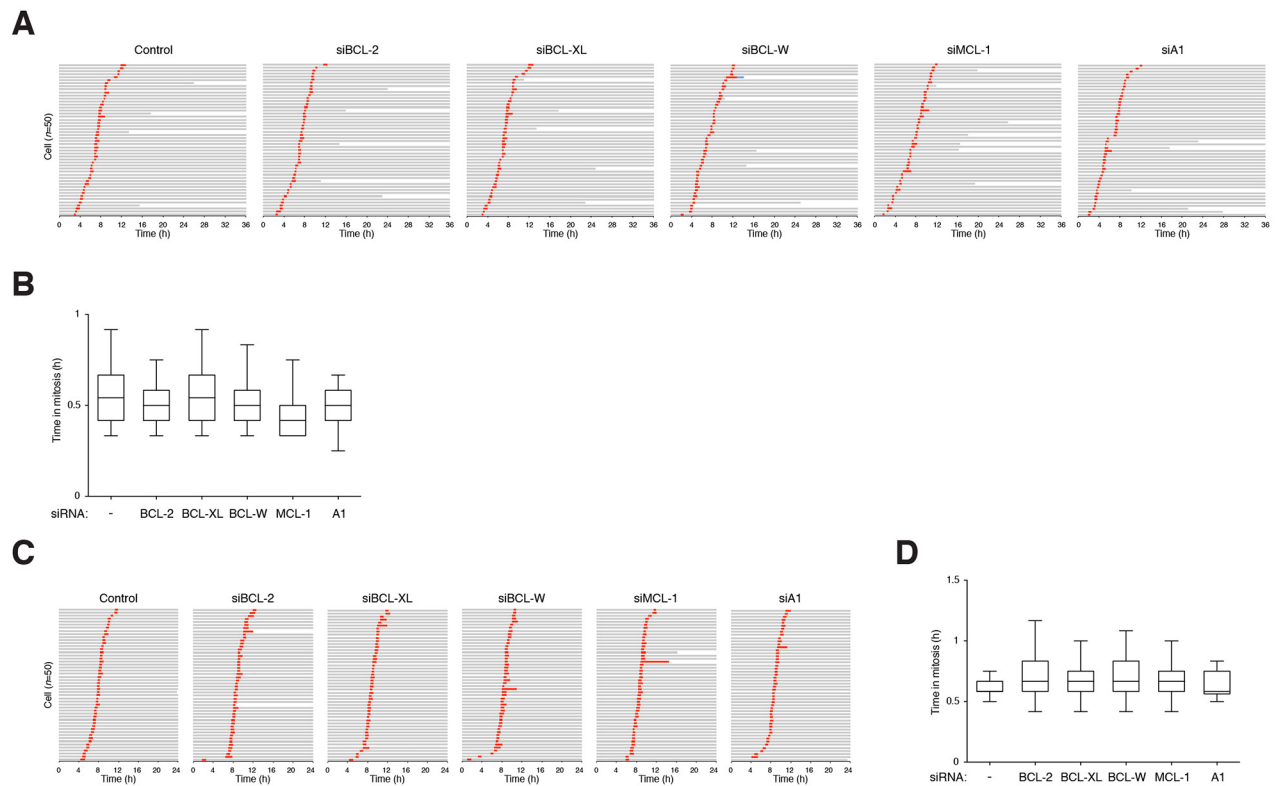

**Supplementary Figure S4: Depletion of anti-apoptotic BCL-2-like proteins does not affect normal mitotic progression or cell viability.** **A.** Live trace of HCT116 cells transfected with siRNA targeting the indicated anti-apoptotic members in the BCL-2 family ( $n=50$ ). Key: same as Figure 1C. **B.** Box-and-whisker plots showing elapsed time between mitotic entry and exit from (A) ( $n=50$  for each group). **C.** Live trace of HeLa cells transfected with siRNA targeting the indicated anti-apoptotic members in the BCL-2 family ( $n=50$ ). Key: same as Figure 1C. **D.** Box-and-whisker plots showing elapsed time between mitotic entry and exit from (C) ( $n=50$  for each group).

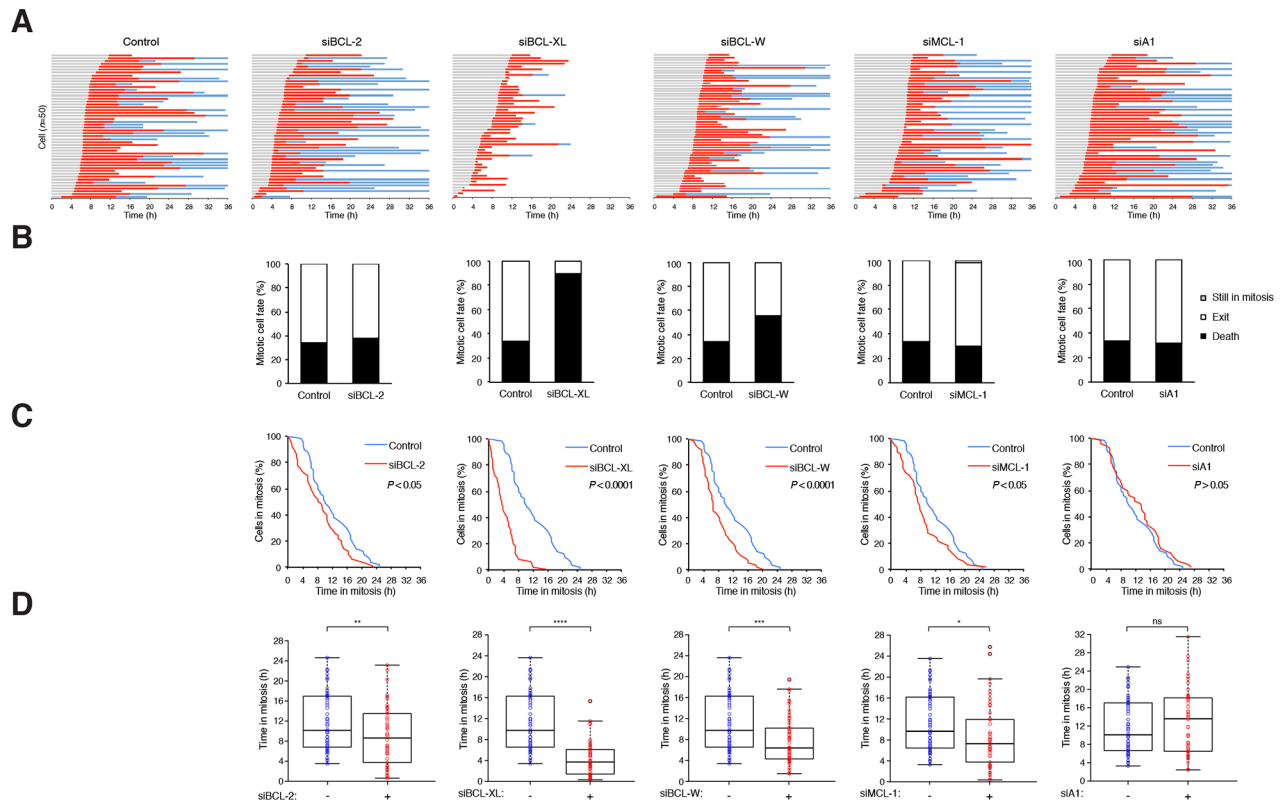

**Supplementary Figure S5: Depletion of several BCL-2-like proteins curtails mitotic block in HCT116 cells. A.** Depletion of BCL-2, BCL-XL, BCL-W, or MCL-1 accelerates PTX-mediated mitotic cell death or exit. HCT116 cells expressing histone H2B-GFP were transfected with different siRNAs. The cells were synchronized, exposed to PTX (500 ng/ml) and analyzed with live-cell imaging ( $n=50$ ). Key: same as Figure 1C. **B.** Percentage of different mitotic fates from (A). **C.** The durations of mitotic block of cells from (A) are plotted using Kaplan-Meier estimator. **D.** Box-and-whisker plots showing elapsed time from mitotic entry to either mitotic exit or death. Student's t-test  $*P < 0.05$ ;  $**P < 0.01$ ;  $***P < 0.001$ ;  $****P < 0.0001$ ; ns  $P > 0.05$ .

**A**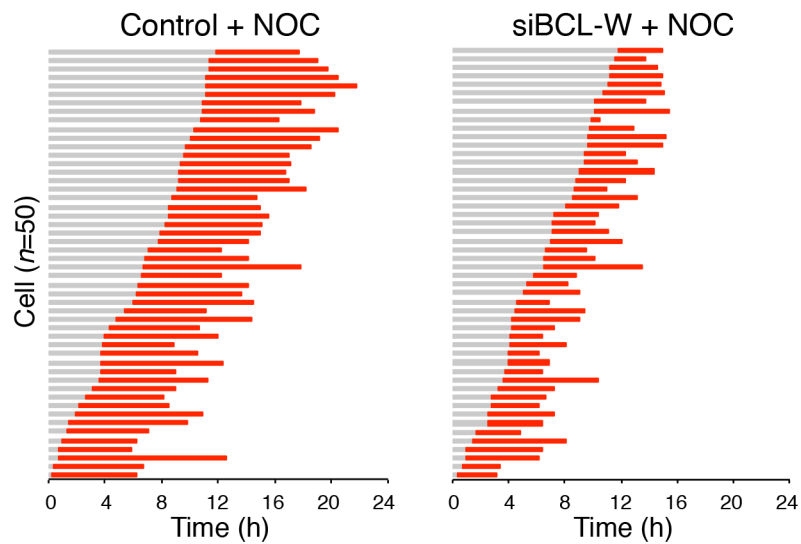**B**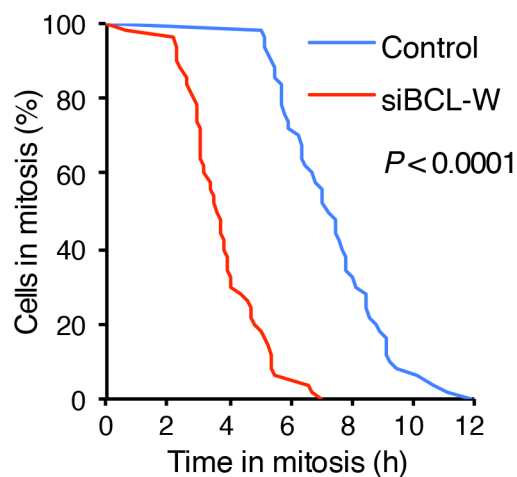**C**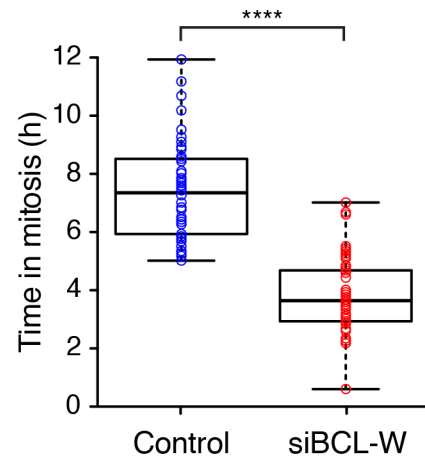

**Supplementary Figure S6: Depletion of BCL-W accelerates NOC-induced mitotic cell death.** **A.** Depletion of BCL-W accelerates NOC-induced mitotic cell death. HeLa cells expressing histone H2B-GFP were transfected with siBCL-W. The cells were synchronized, exposed to NOC (25 ng/ml) and analyzed with live-cell imaging ( $n=50$ ). Key: same as Figure 1C. **B.** The durations of mitotic block of cells from (A) are plotted using Kaplan-Meier estimator. **C.** Box-and-whisker plots showing elapsed time from mitotic entry to mitotic death. Student's t-test \*\*\*\* $P < 0.0001$ .

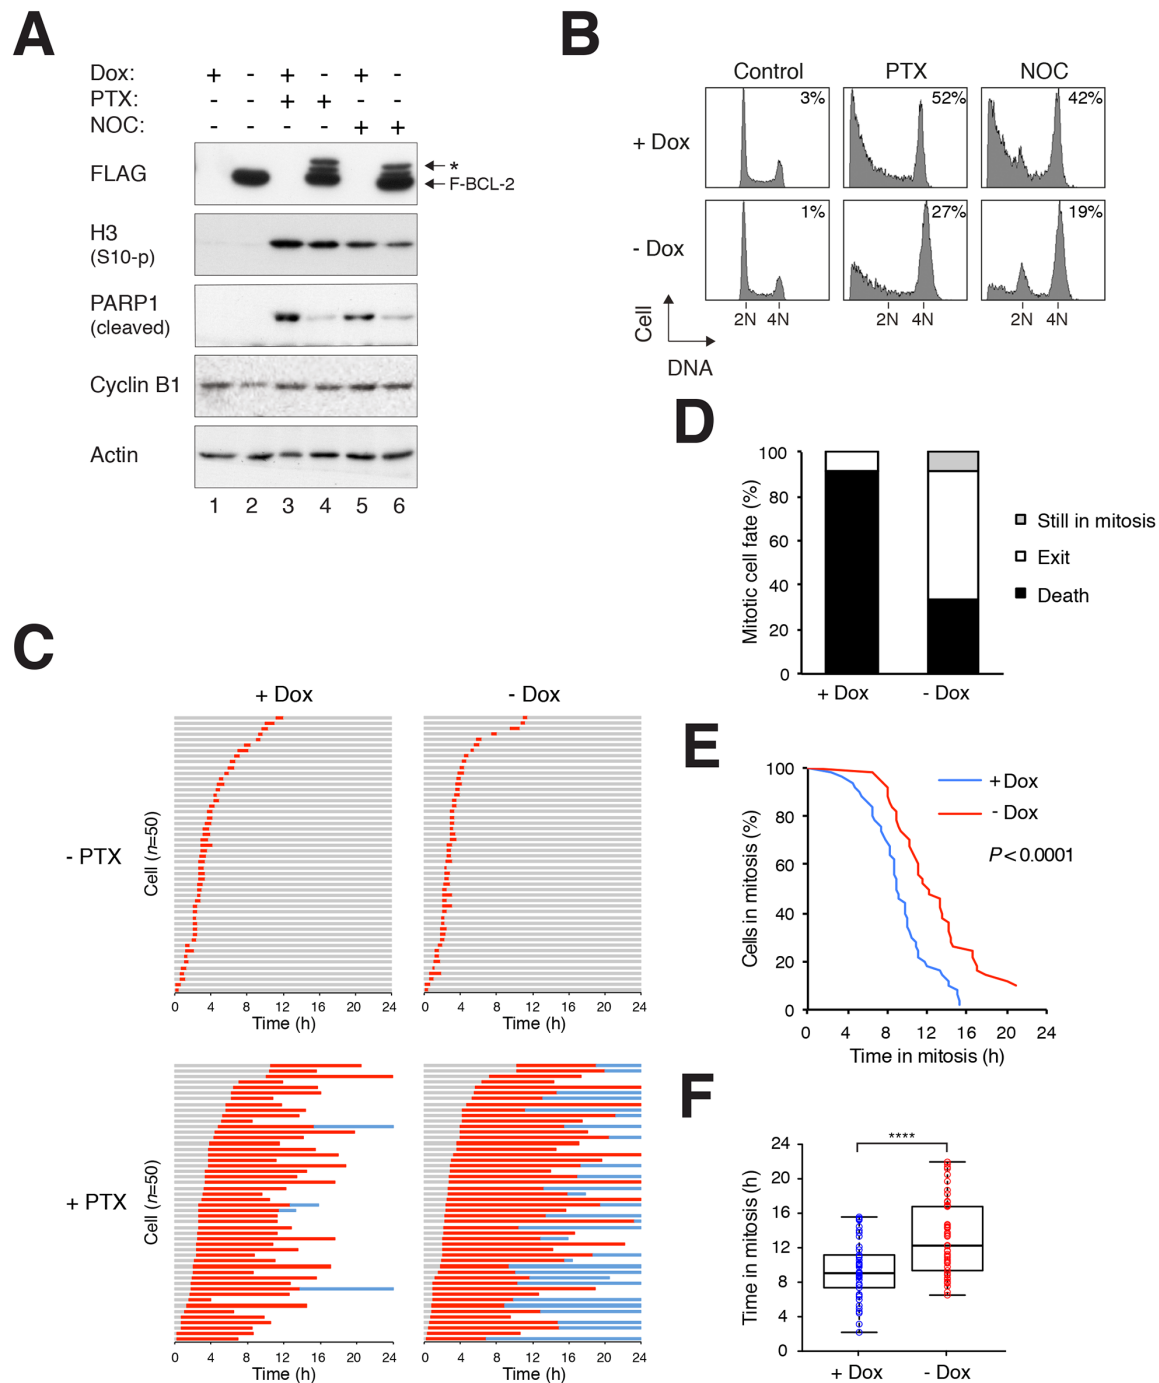

**Supplementary Figure S7: Delay of mitotic cell death by ectopic expression of BCL-2.** **A.** BCL-2 inhibits PARP1 cleavage. HeLa cells expressing FLAG-BCL-2 were grown in the presence or absence of Dox for 3 days to turn off or on FLAG-BCL-2 respectively. The cells were exposed to PTX (31.3 ng/ml) or NOC (25 ng/ml). After 24 h, the cells were harvested and analyzed with immunoblotting. The asterisk indicates the phosphorylated form of BCL-2. **B.** BCL-2 inhibits apoptosis. Cells were treated as in (A). After 24 h, the cells were harvested and analyzed with flow cytometry. The percentages of sub- $G_1$  cells are quantified. **C.** BCL-2 delays mitotic cell death. HeLa cells expressing FLAG-BCL-2 (and also histone H2B-GFP) were grown in the presence or absence of Dox for 3 days to turn off or on FLAG-BCL-2 respectively. The cells were synchronized, exposed to PTX (31.3 ng/ml) and analyzed with live-cell imaging ( $n=50$ ). Key: same as Figure 1C. **D.** Percentage of different mitotic fates from (C). **E.** The durations of mitotic block of PTX-treated cells from (C) are plotted using Kaplan-Meier estimator. **F.** Box-and-whisker plots showing elapsed time from mitotic entry to either mitotic exit or death (cell still in mitosis at the end imaging were included). Student's t-test \*\*\*\* $P < 0.0001$ .

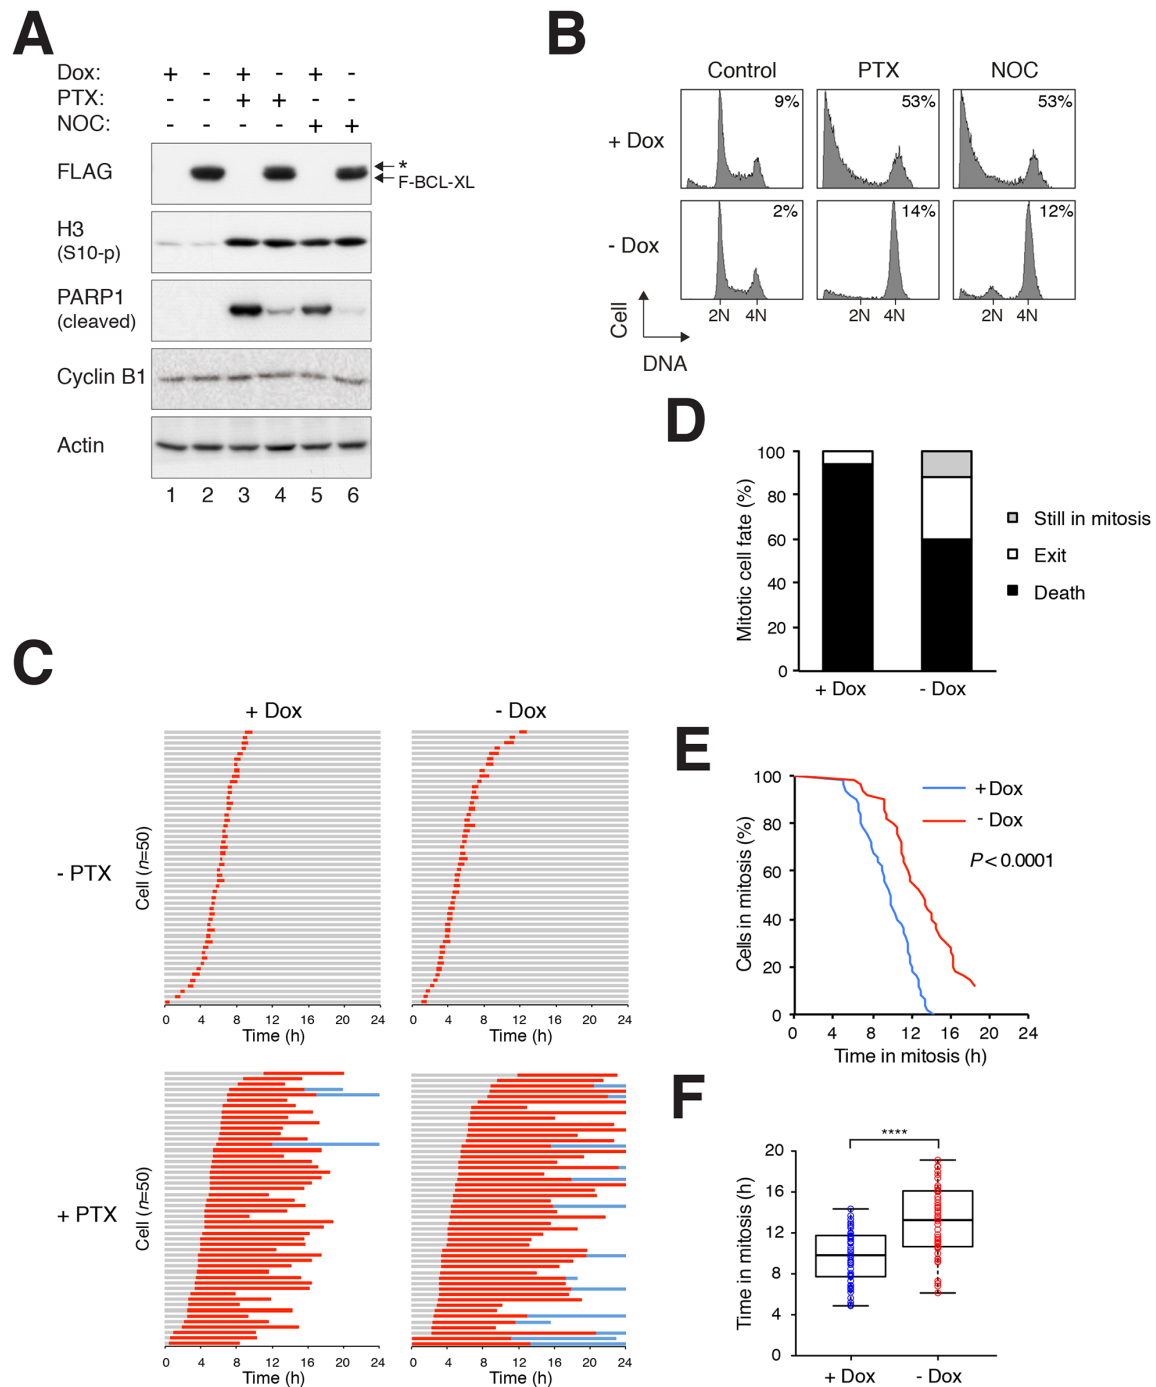

**Supplementary Figure S8: Delay of mitotic cell death by ectopic expression of BCL-XL.** **A.** BCL-XL inhibits PARP1 cleavage. HeLa cells expressing FLAG-BCL-XL were grown in the presence or absence of Dox for 3 days to turn off or on FLAG-BCL-XL respectively. The cells were exposed to PTX (31.3 ng/ml) or NOC (25 ng/ml). After 24 h, the cells were harvested and analyzed with immunoblotting. The asterisk indicates the phosphorylated form of BCL-XL. **B.** BCL-XL inhibits apoptosis. Cells were treated as in (A). After 24 h, the cells were harvested and analyzed with flow cytometry. The percentages of sub- $G_1$  cells are quantified. **C.** BCL-XL delays mitotic cell death. HeLa cells expressing FLAG-BCL-XL (and also histone H2B-GFP) were grown in the presence or absence of Dox for 3 days to turn off or on FLAG-BCL-XL respectively. The cells were synchronized, exposed to PTX (31.3 ng/ml) and analyzed with live-cell imaging ( $n=50$ ). Key: same as Figure 1C. **D.** Percentage of different mitotic fates from (C). **E.** The durations of mitotic block of PTX-treated cells from (C) are plotted using Kaplan-Meier estimator. **F.** Box-and-whisker plots showing elapsed time from mitotic entry to either mitotic exit or death (cell still in mitosis at the end imaging were included). Student's t-test \*\*\*\* $P < 0.0001$ .



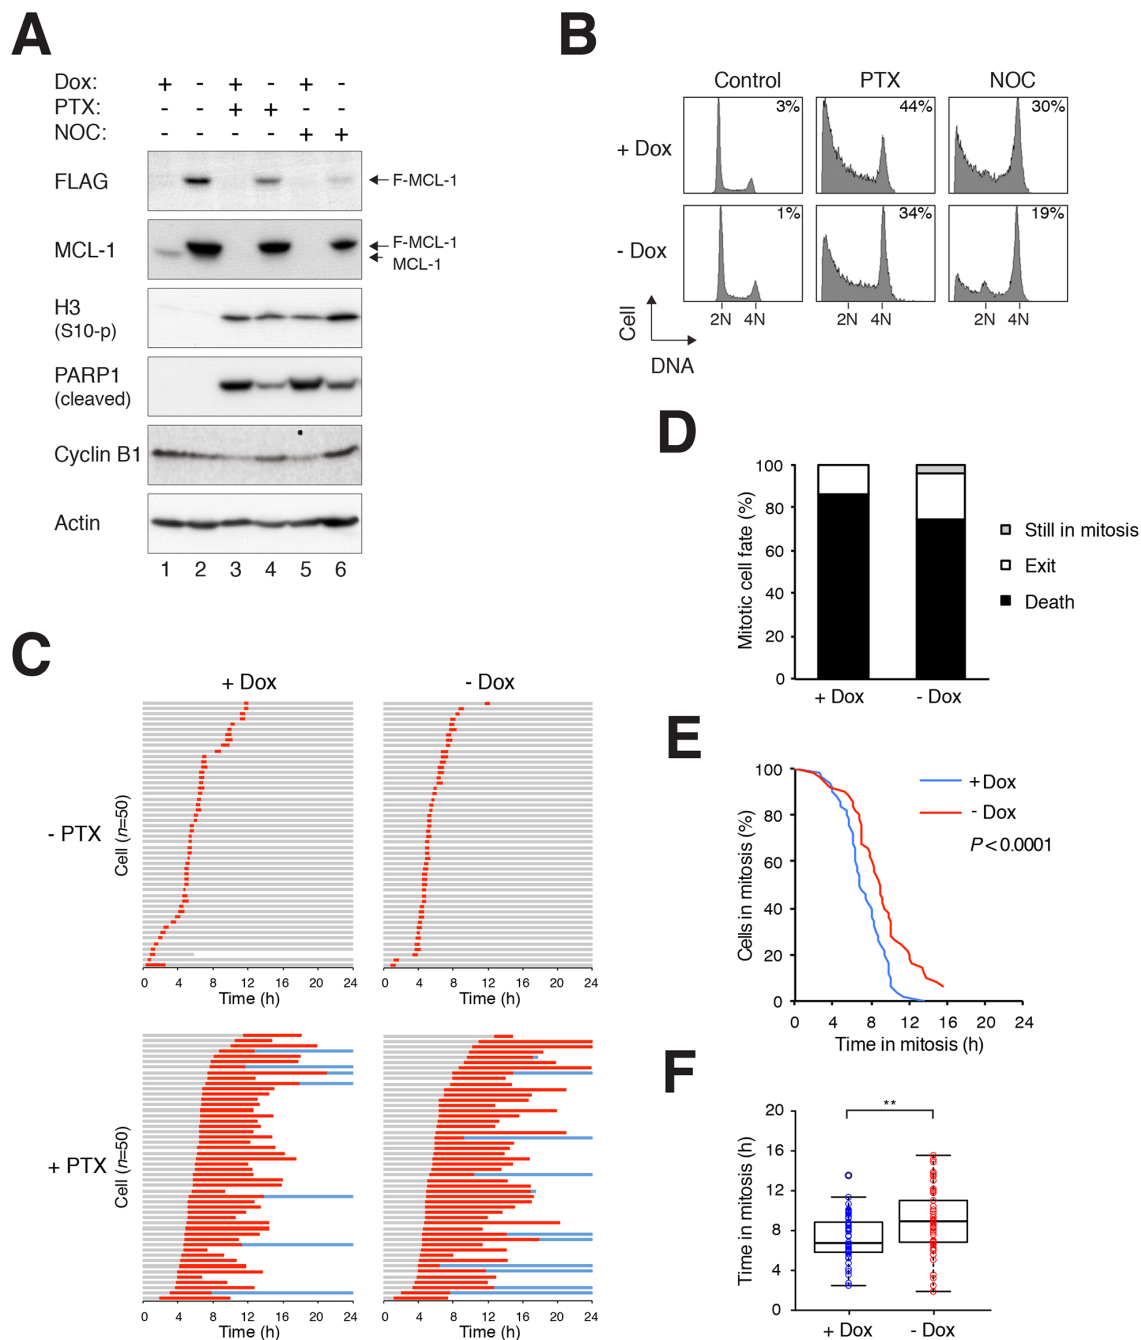

**Supplementary Figure S9: Delay of mitotic cell death by ectopic expression of MCL-1.** **A.** MCL-1 inhibits PARP1 cleavage. HeLa cells expressing FLAG-MCL-1 were grown in the presence or absence of Dox for 3 days to turn off or on FLAG-MCL-1 respectively. The cells were exposed to PTX (31.3 ng/ml) or NOC (25 ng/ml). After 24 h, the cells were harvested and analyzed with immunoblotting. Note that for as unknown reasons FLAG-MCL-1 was detected by the anti-FLAG antibodies weakly, the FLAG-MCL1 and endogenous MCL-1 (which is absent during mitosis) were also detected with anti-MCL1 antibodies. **B.** MCL-1 inhibits apoptosis. Cells were treated as in (A). After 24 h, the cells were harvested and analyzed with flow cytometry. The percentages of sub- $G_1$  cells are quantified. **C.** MCL-1 delays mitotic cell death. HeLa cells expressing MCL-1 (and also histone H2B-GFP) were grown in the presence or absence of Dox for 3 days to turn off or on MCL-1 respectively. The cells were synchronized, exposed to PTX (31.3 ng/ml) and analyzed with live-cell imaging ( $n=50$ ). Key: same as Figure 1C. **D.** Percentage of different mitotic fates from (C). **E.** The durations of mitotic block of PTX-treated cells from (C) are plotted using Kaplan-Meier estimator. **F.** Box-and-whisker plots showing elapsed time from mitotic entry to either mitotic exit or death (cell still in mitosis at the end imaging were included). Student's t-test  $**P < 0.01$ .

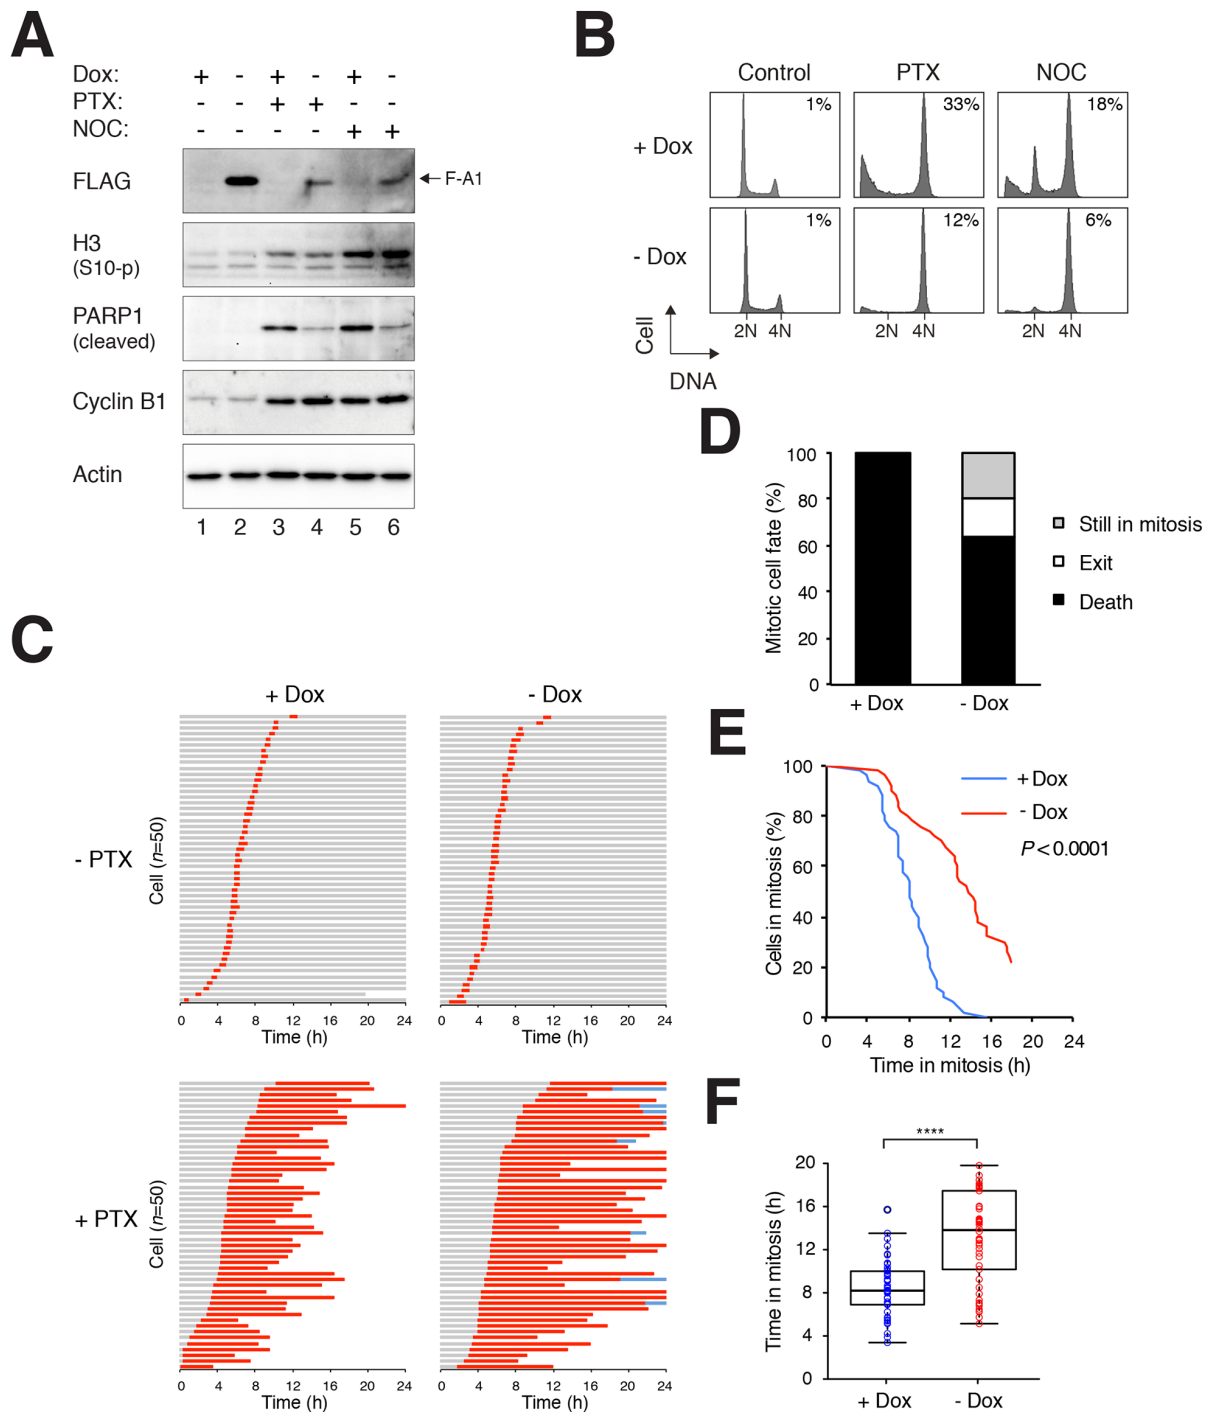

**Supplementary Figure S10: Delay of mitotic cell death by ectopic expression of A1.** **A.** A1 inhibits PARP1 cleavage. HeLa cells expressing FLAG-A1 were grown in the presence or absence of Dox for 3 days to turn off or on FLAG-A1 respectively. The cells were exposed to PTX (31.3 ng/ml) or NOC (25 ng/ml). After 24 h, the cells were harvested and analyzed with immunoblotting. **B.** A1 inhibits apoptosis. Cells were treated as in (A). After 24 h, the cells were harvested and analyzed with flow cytometry. The percentages of sub-G<sub>1</sub> cells are quantified. **C.** A1 delays mitotic cell death. HeLa cells expressing A1 (and also histone H2B-GFP) were grown in the presence or absence of Dox for 3 days to turn off or on A1 respectively. The cells were synchronized, exposed to PTX (31.3 ng/ml) and analyzed with live-cell imaging ( $n=50$ ). Key: same as Figure 1C. **D.** Percentage of different mitotic fates from (C). **E.** The durations of mitotic block of PTX-treated cells from (C) are plotted using Kaplan-Meier estimator. **F.** Box-and-whisker plots showing elapsed time from mitotic entry to either mitotic exit or death (cell still in mitosis at the end imaging were included). Student's t-test \*\*\*\* $P < 0.0001$ .

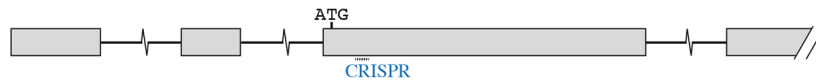

Reference: . . . GACTTTGTAGGTTATAAGCTGAGGCAGAAGGGTTATGTCTGTGGAGCTGGCCCCGGGGAGGGCCAGCAGCTGA . . .  
 HaLa: . . . GACTTTGTAGGTTATAAGCTGAGGCAGAAGGGTTATGTCTGTGGAGCTGGCCCCGGGGAGGGCCAGCAGCTGA . . .  
 BCL-W<sup>KO</sup>: . . . GACTTTGTAGGTTATAAG-TGAGGCAGAAGGGTTATGTCTGTGGAGCTGGCCCCGGGGAGGGCCAGCAGCTGA . . .  
 BCL-W<sup>KO</sup>: . . . GACTTTGTAGGTTA-----TGAGGCAGAAGGGTTATGTCTGTGGAGCTGGCCCCGGGGAGGGCCAGCAGCTGA . . .

**Supplementary Figure S11: Disruption of *BCL-W* gene.** Schematic diagram of the *BCL-W* gene is shown at the top (boxes: exons; lines: introns). ATG indicates the position of the start of the ORF; and CRISPR indicates the position of the targeting site of the CRISPR-Cas9 construct. The sequence of normal *BCL-W* according to the reference human sequence database is shown. The targeting sequences of the CRISPR-Cas9 are highlighted in blue. The *BCL-W* gene from HeLa and BCL-W<sup>KO</sup> cells was sequenced. The reading frame of the ORF is indicated (green). Deletions of one and five bases were found in BCL-W<sup>KO</sup>, resulting in frame shifts and premature termination (red). These changes are expected to produce products containing 22 aa and 37 aa, respectively (full length BCL-W contains 193 aa).

**Supplementary Video S1: Normal mitosis.** HeLa cells expressing histone H2B-GFP were synchronized at G<sub>1</sub>/S with a double thymidine procedure and released into the cell cycle in the absence of PTX. The cells were analyzed with time-lapse microscopy. An example of normal mitosis is shown (left: bright field; right: histone H2B-GFP).

See Supplementary File 1

**Supplementary Video S2: Mitotic cell death.** HeLa cells expressing histone H2B-GFP were synchronized at G<sub>1</sub>/S with a double thymidine procedure and released into the cell cycle in the presence of PTX. The cells were analyzed with time-lapse microscopy. An example of mitotic cell death is shown (left: bright field; right: histone H2B-GFP).

See Supplementary File 2

**Supplementary Video S3: Mitotic slippage.** HeLa cells expressing histone H2B-GFP were synchronized at G<sub>1</sub>/S with a double thymidine procedure and released into the cell cycle in the presence of PTX. The cells were analyzed with time-lapse microscopy. An example of mitotic slippage is shown (left: bright field; right: histone H2B-GFP).

See Supplementary File 3
